# Supplementary material for: Construction of Bi2WO6 with double active sites of tunable metallic Bi and oxygen vacancies for photocatalytic oxidation of cyclohexane to cyclohexanone
Source: Royal Society of Chemistry journal article supplement (doi:10.1039/d2dt03560j), 2022-12-12
Supplement: d2dt03560j1.pdf [file d2dt03560j1.pdf]

**Constructing of Bi<sub>2</sub>WO<sub>6</sub> with double active sites of tunable metallic Bi and oxygen vacancy for photocatalytic oxidation of cyclohexane to cyclohexanone**

Jun-Lei Wang,<sup>a</sup> Kuan Wang,<sup>\*a</sup> Zhen-Hong He,<sup>a</sup> Tong Sun,<sup>a</sup> Run-Jing You<sup>a</sup>, Jian-Gang Chen,<sup>b</sup>  
Weitao Wang,<sup>a</sup> Yang Yang,<sup>a</sup> Zhao-Tie Liu<sup>\*a,b</sup>

<sup>a</sup>Key Laboratory of Chemical Additives for China National Light Industry, College of Chemistry and Chemical Engineering, Shaanxi University of Science and Technology, Xi'an, 710021, China

<sup>b</sup>School of Chemistry & Chemical Engineering, Shaanxi Normal University, Xi'an, 710119, China

**Corresponding Author**

\*E-mail: [wangkuan@sust.edu.cn](mailto:wangkuan@sust.edu.cn) (K. Wang), [ztliu@snnu.edu.cn](mailto:ztliu@snnu.edu.cn) (Z.-T. Liu).

The possible mechanisms of the OV-Bi/Bi<sub>2</sub>WO<sub>6</sub> for the photothermal oxidation of cyclohexane are summarized as follows.

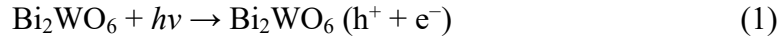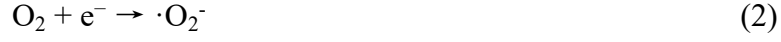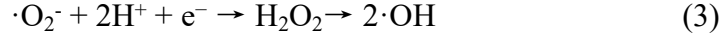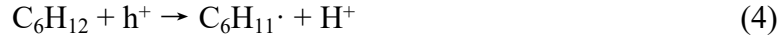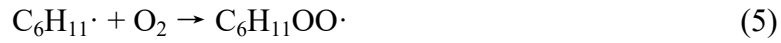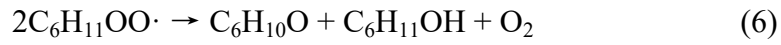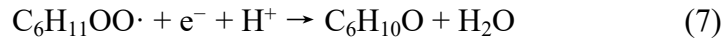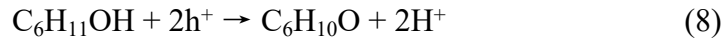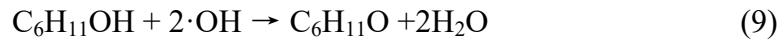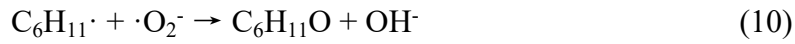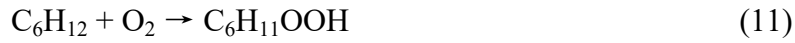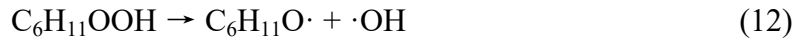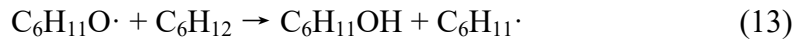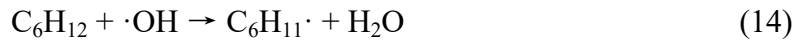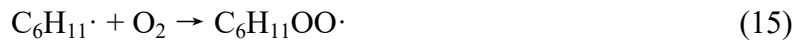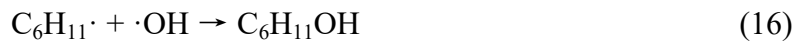

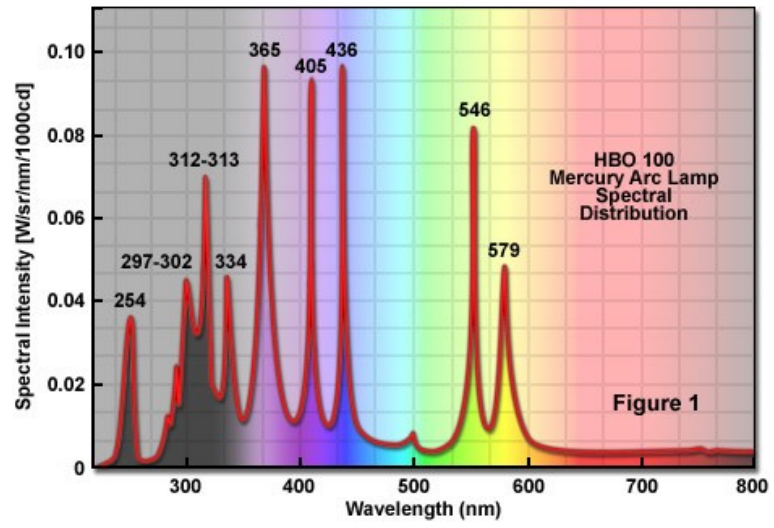

Fig. S1. The wavelength image of the Hg lamp

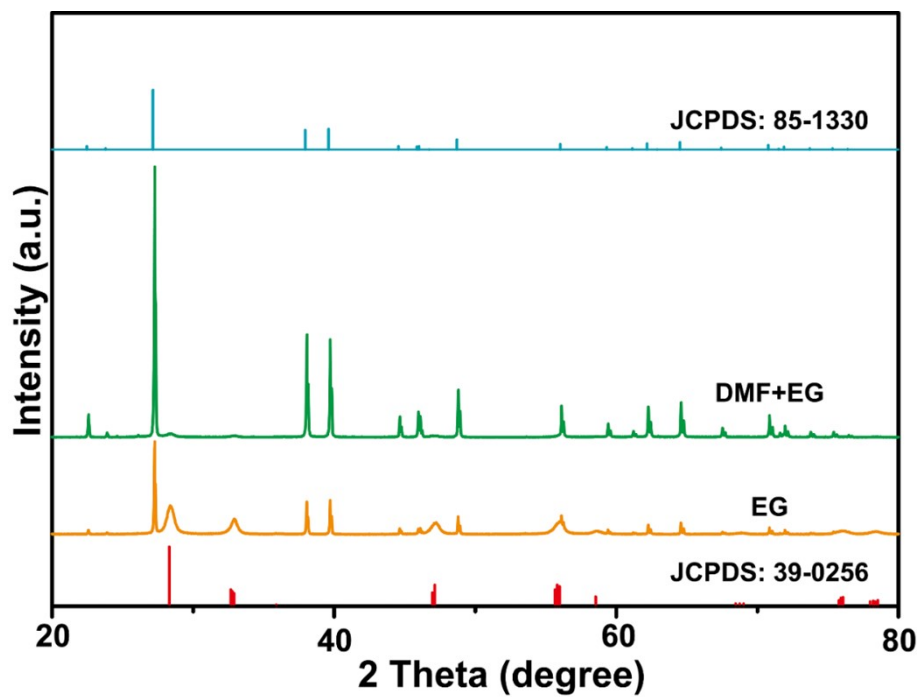

Fig. S2. XRD patterns of OV-Bi/Bi<sub>2</sub>WO<sub>6</sub> in EG and EG+DMF

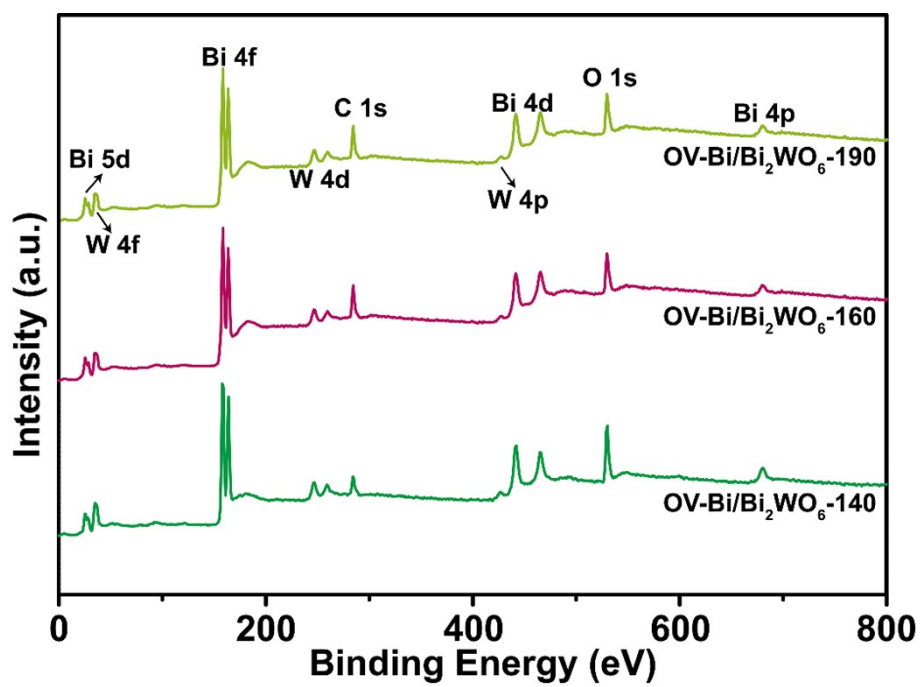

Fig. S3. The survey spectrum of OV-Bi/Bi<sub>2</sub>WO<sub>6</sub>-140, OV-Bi/Bi<sub>2</sub>WO<sub>6</sub>-160, and OV-Bi/Bi<sub>2</sub>WO<sub>6</sub>-190.

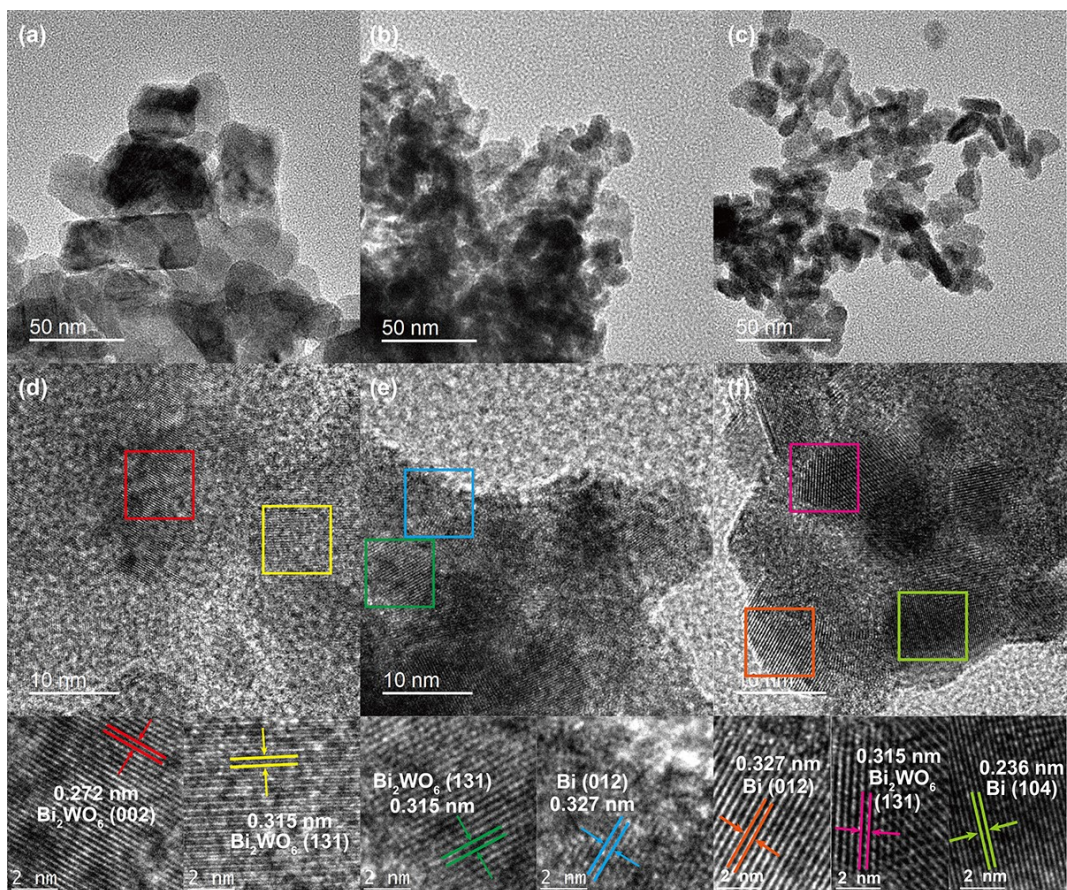

Fig. S4. TEM and HRTEM of (a, d) OV-Bi/Bi<sub>2</sub>WO<sub>6</sub>-150, (b, e) OV-Bi/Bi<sub>2</sub>WO<sub>6</sub>-170, (c, f) OV-Bi/Bi<sub>2</sub>WO<sub>6</sub>-180.

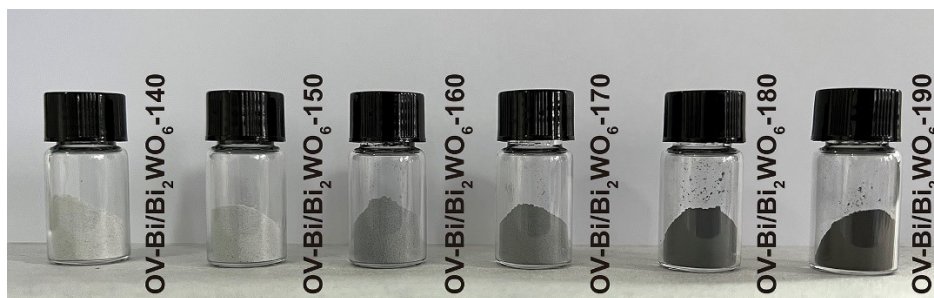

Fig. S5. The color of OV-Bi/Bi<sub>2</sub>WO<sub>6</sub>

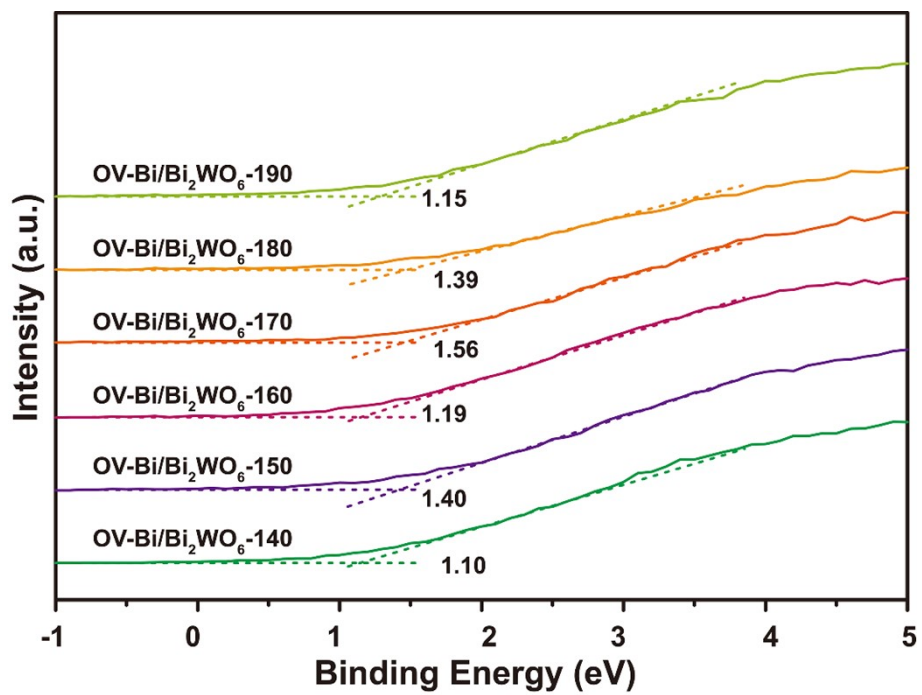

Fig. S6. VB-XPS spectra of samples of OV-Bi/Bi<sub>2</sub>WO<sub>6</sub>



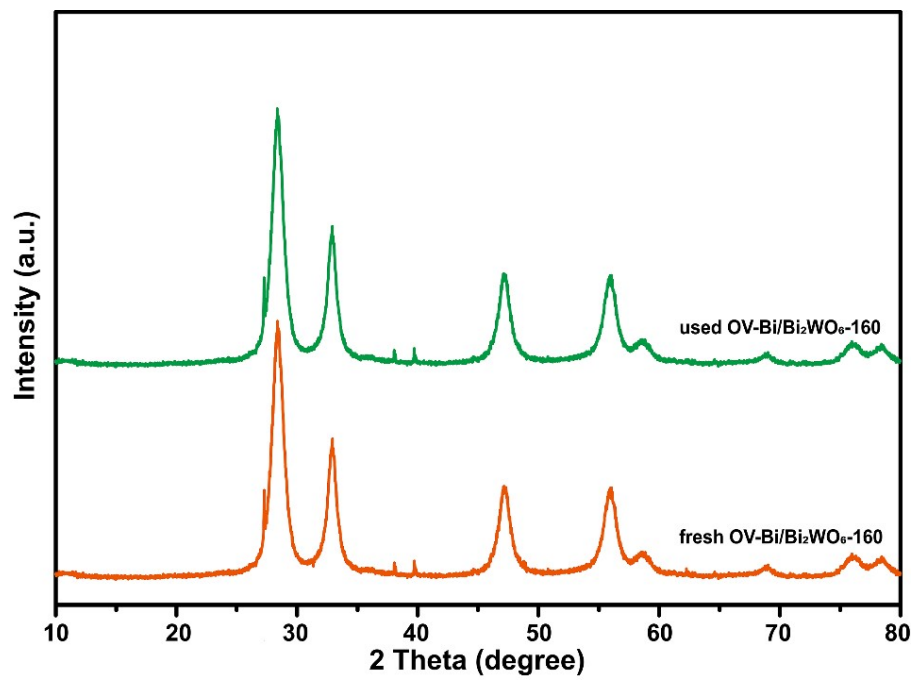

Fig. S7. XRD patterns of used and fresh OV-Bi/Bi<sub>2</sub>WO<sub>6</sub>-160 sample.

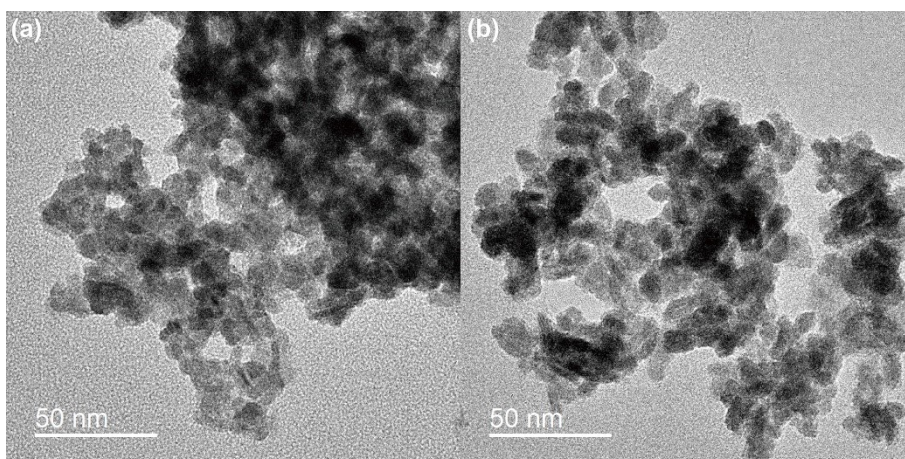

Fig. S8. TEM images of used and fresh OV-Bi/Bi<sub>2</sub>WO<sub>6</sub>-160 sample.

Table S1 Photocatalytic activities comparison of reported for the photocatalytic oxidation of CHA

| Catalysts                                          | Reaction condition                                                                          | Oxidant                   | CHA-one                  |        | Ref.         |
|----------------------------------------------------|---------------------------------------------------------------------------------------------|---------------------------|--------------------------|--------|--------------|
|                                                    |                                                                                             |                           | Amounts/ $\mu\text{mol}$ | Sel./% |              |
| TiO <sub>2</sub> /rGO <sub>0.5</sub>               | 20 mg cat., 5 mL CHA,<br>2000 W Xe Lamp ( $\lambda > 300$ nm), 12 h                         | 1 atm O <sub>2</sub>      | 40.1                     | 83.0   | [S1]         |
| <i>h</i> -BN/TiO <sub>2</sub>                      | 50 mg cat., 3 mL CHA,<br>300 W Xe Lamp ( $\lambda > 300$ nm), 12 h                          | 1 atm O <sub>2</sub>      | 43.9                     | 85.4   | [S2]         |
| In <sub>2</sub> O <sub>3</sub> /N-TiO <sub>2</sub> | 50 mg cat., 3 mL CHA,<br>300 W Xe Lamp ( $\lambda > 300$ nm), 12 h                          | 1 atm O <sub>2</sub>      | 46.3                     | 89.7   | [S3]         |
| N-TiO <sub>2</sub> -3                              | 50 mg cat., 10 mL CHA, 10 mL CCl <sub>4</sub> ,<br>300 W Xe Lamp ( $\lambda > 420$ nm), 5 h | 0.1 MPa<br>O <sub>2</sub> | 112.4                    | 100    | [S4]         |
| AFO/SBA                                            | 30 mg cat., 1.5 mL CHA, 18.5 mL<br>CAN, solar simulator, 24 h                               | 1 atm O <sub>2</sub>      | 70                       | 51     | [S5]         |
| BiVO <sub>4</sub>                                  | 50 mg cat., 4 mM CHA, 5 mL CAN,<br>20 W W-Br lamp, 8 h                                      | 1 atm O <sub>2</sub>      | 72.6                     | 72.6   | [S6]         |
| BiOI-10                                            | 25 mg cat., 24.975 mL CHA, 0.025 mL<br>H <sub>2</sub> O, 400 W metal halides-lamp, 3 h      | 1 atm air                 | 3.1                      | 98.75  | [S7]         |
| BiOI                                               | 25 mg cat., 24.975 mL CHA, 0.025 mL<br>H <sub>2</sub> O, 400 W metal halides-lamp, 3 h      | 1 atm air                 | 20.2                     | 99.3   | [S8]         |
| OV-BiOCl-P                                         | 50 mg cat., 3 mL CHA,<br>500 W Hg lamp, 10 h                                                | 1 atm air                 | 228.1                    | 81.1   | [S9]         |
| OV-Bi/BiOCl-160                                    | 50 mg cat., 3 mL CHA,<br>500 W Hg lamp, 10 h                                                | 1 atm air                 | 128.9                    | 93.6   | This<br>work |

Table S2 Fluorescence emission lifetime and relevant percentage data fitted by a bi-exponential function

| Samples                                    | $\tau_1$ (ns) | $A_1$ (%) | $\tau_2$ (ns) | $A_2$ (%) | $\tau_a$ (ns) |
|--------------------------------------------|---------------|-----------|---------------|-----------|---------------|
| OV-Bi/Bi <sub>2</sub> WO <sub>6</sub> -140 | 0.7407        | 75.24     | 5.0545        | 24.76     | 3.73          |
| OV-Bi/Bi <sub>2</sub> WO <sub>6</sub> -160 | 0.8569        | 59.76     | 4.7606        | 40.24     | 3.94          |
| OV-Bi/Bi <sub>2</sub> WO <sub>6</sub> -190 | 0.9918        | 92.34     | 5.5807        | 7.66      | 2.45          |

The decay curves could be well-fitted by a biexponential function:

$$I_{(t)} = I_0 + A_1 \exp(-t/\tau_1) + A_2 \exp(-t/\tau_2) \quad (1)$$

where  $A_1$  and  $A_2$  represent the excited state emission decay amplitudes,  $I_0$  is a constant about the baseline offset,  $\tau_1$  refers to the fast decay of trap-mediated nonradiative recombination, and  $\tau_2$  is the slow decay correlated to radiative recombination [S10,S11].

The average lifetime is calculated from the following equation:

$$\tau_a = (A_1 \tau_1^2 + A_2 \tau_2^2) / (A_1 \tau_1 + A_2 \tau_2) \quad (2)$$

## References

- [S1]. Y. Shiraishi, S. Shiota, H. Hirakawa, S. Tanaka, S. Ichikawa, T. Hirai, Titanium dioxide/reduced graphene oxide hybrid photocatalysts for efficient and selective partial oxidation of cyclohexane, *ACS Catal.* 7 (2017) 293-300.
- [S2]. K. Wang, B. Xue, J. Wang, Z. He, X. Zhang, S. Li, W. Wang, Y. Yang, Z. Liu, Efficient and selective oxidation of cyclohexane to cyclohexanone over flake hexagonal boron nitride/titanium dioxide hybrid photocatalysts, *Mol. Catal.* 505 (2021) 111530.
- [S3]. K. Wang, B. Xue, J. Wang, Z.-H. He, S.-S. Li, D. Wang, W.-T. Wang, Y. Yang, and Z.-T. Liu, Construction of Indium Oxide/N-Doped Titanium Dioxide Hybrid Photocatalysts for Efficient and Selective Oxidation of Cyclohexane to Cyclohexanone, *J Phys. Chem. C*, 125(36) (2021) 19791-19801.
- [S4]. G. Xu, Y. Zhang, D. Peng, D. Sheng, Y. Tian, D. Ma, Y. Zhang, Nitrogen-doped mixed-phase TiO<sub>2</sub> with controllable phase junction as superior visible-light photocatalyst for selective oxidation of cyclohexane, *Appl. Surf. Sci.* 536 (2021) 147953.
- [S5]. Y. Ide, S. Tominaka, Y. Yoneno, K. Komaguchi, T. Takei, H. Nishida, N. Tsunoji, A. Machida, T. Sano, Condensed ferric dimers for green photocatalytic synthesis of nylon precursors, *Chem. Sci.* 10 (2019) 6604-6611.
- [S6]. L. Xiang, J. Fan, W. Zhong, L. Mao, K. You, D. Yin, Heteroatom-induced band-reconstruction of metal vanadates for photocatalytic cyclohexane oxidation towards KA-oil selectivity, *Appl. Catal. A Gen.* 575 (2019) 120-131.
- [S7]. D. Contreras, V. Melin, K. Márquez, G. Pérez-González, H. Mansilla, G. Pecchi, A. Henríquez, Selective oxidation of cyclohexane to cyclohexanol by bioi under visible light: Role of the ratio (110)/(001) facet, *Appl. Catal. B Environ.* 251 (2019) 17-24.
- [S8]. A. Henríquez, H. Mansilla, A. Martínez-de la Cruz, J. Freer, D. Contreras, Selective oxofunctionalization of cyclohexane over titanium dioxide-based and bismuth oxyhalide (BiOX, X=Cl<sup>-</sup>, Br<sup>-</sup>, I<sup>-</sup>) photocatalysts by visible light

- irradiation, *Appl. Catal. B Environ.* 206 (2017) 252-262.
- [S9]. J. Wang, K. Wang, Z.-H. He, R.-R. Zhang, P. Guo, W. Wang, Y. Yang, Z.-T. Liu, Constructing of ultrathin Bi<sub>2</sub>WO<sub>6</sub>/BiOCl nanosheets with oxygen vacancies for photocatalytic oxidation of cyclohexane with air in solvent-free, *Appl. Surf. Sci.* 584 (2022): 152606.
- [S10] S. Meng, C. Chen, X. Gu, H. Wu, Q. Meng, J. Zhang, S. Chen, X. Fu, D. Liu, W. Lei, Efficient photocatalytic H<sub>2</sub> evolution, CO<sub>2</sub> reduction and N<sub>2</sub> fixation coupled with organic synthesis by cocatalyst and vacancies engineering, *Appl. Catal. B Environ.* 285 (2021) 119789.
- [S11] Y. Yang, Z. Zeng, G. Zeng, D. Huang, R. Xiao, C. Zhang, C. Zhou, W. Xiong, W. Wang, M. Cheng, W. Xue, H. Guo, X. Tang and D. He, Ti<sub>3</sub>C<sub>2</sub> mxene/porous g-C<sub>3</sub>N<sub>4</sub> interfacial Schottky junction for boosting spatial charge separation in photocatalytic H<sub>2</sub>O<sub>2</sub> production, *Appl. Catal. B Environ.* 258 (2019) 117956.
